# Supplementary material for: Theoretical investigation of the role of hydrogenation-induced strain in single-layer h10-Si
Source: Royal Society of Chemistry journal article supplement (doi:10.1039/d2cp04855h), 2022-12-02
Supplement: d2cp04855h1.pdf [file d2cp04855h1.pdf]

## Supplementary Information: Theoretical investigation of the role of hydrogenation-induced strain in single-layer $h10$ -Si

Deju Zhang,<sup>1,2</sup> Peng Jiang,<sup>1, a)</sup> Hong-Mei Huang,<sup>1</sup> Yanning Zhang,<sup>2</sup> and Yan-Ling Li<sup>1, b)</sup>

<sup>1)</sup>*School of Physics and Electronic Engineering, Jiangsu Normal University, Xuzhou 221116, China*

<sup>2)</sup>*Institute of Fundamental and Frontier Sciences, University of Electronic Science and Technology of China, Chengdu 610054, China*

(Dated: 7 December 2022)

TABLE S1: Bader analysis of fully hydrogenated SL  $h10$ -Si. The values of  $\delta$  show the charge transfer between silicon and hydrogen atoms.

| Atom | Number | Charge ( $e$ ) | $\delta(e)$ |
|------|--------|----------------|-------------|
| Si1  | 6      | 3.98           | 0.02        |
| Si2  | 4      | 3.47           | 0.53        |
| H    | 4      | 1.56           | -0.56       |

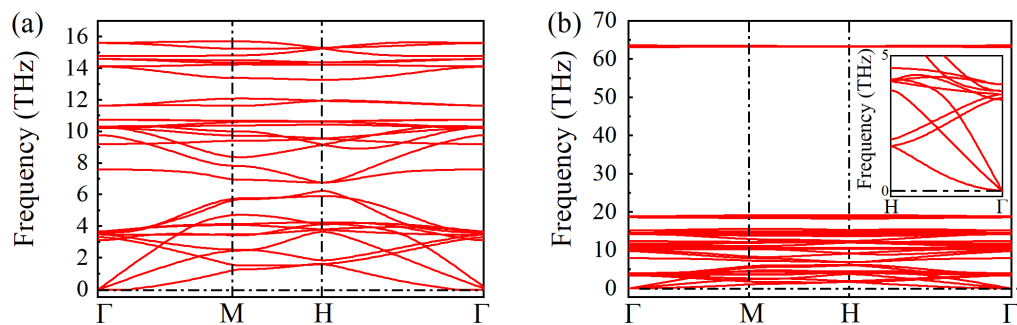

FIG. S1: Phonon spectrum of pristine (a) and fully hydrogenated (b) single-layer (SL)  $h10$ -Si. The inset shows the low-frequency modes of fully hydrogenated SL  $h10$ -Si around  $\Gamma$  point.

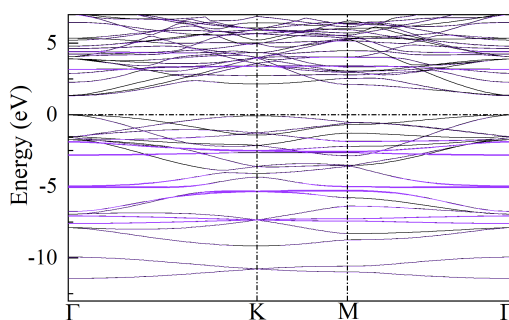

FIG. S2: The orbital projected electronic band structures of fully hydrogenated SL  $h10$ -Si. The  $s$  states of hydrogen atoms are represented by purple lines.

<sup>a)</sup>Electronic mail: [pjiang@jsnu.edu.cn](mailto:pjiang@jsnu.edu.cn)

<sup>b)</sup>Electronic mail: [ylli@jsnu.edu.cn](mailto:ylli@jsnu.edu.cn)

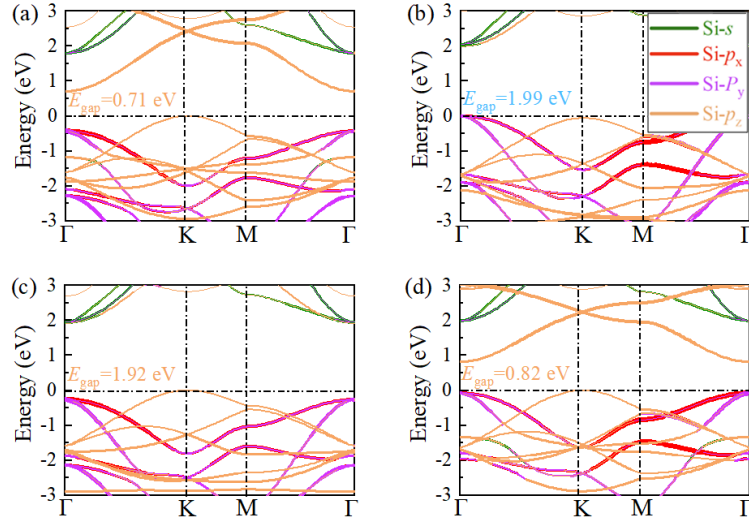

FIG. S3: The orbital projected electronic band structures of SL *h*10-Si in the (a) pristine structure, (b) fully hydrogenated structure, (c) pristine structure after hydrogen atoms attached, and (d) fully hydrogenated structure after hydrogen atoms removal calculated by using HSE06 functional. The values of indirect and direct band gaps are exhibited by orange and blue texts, respectively.

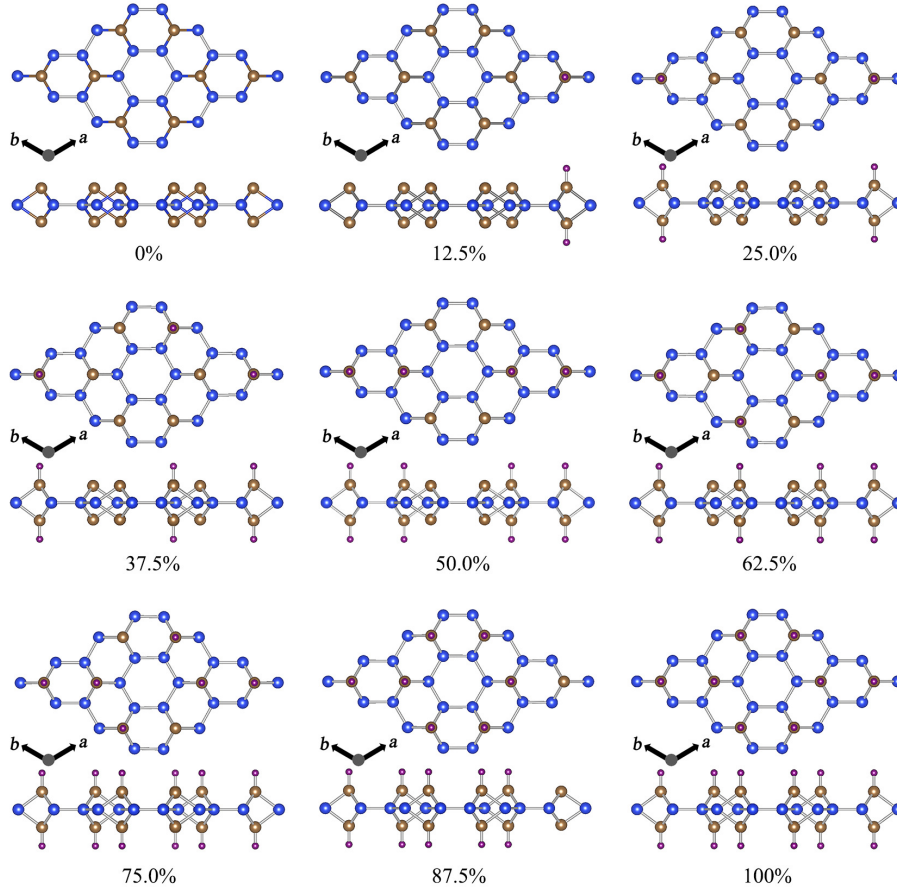

FIG. S4: The structures of hydrogenated SL *h*10-Si with the hydrogenation concentrations of 0%, 12.5%, 25.0%, 37.5%, 50.0%, 62.5%, 75.0%, 87.5% and 100%, respectively.

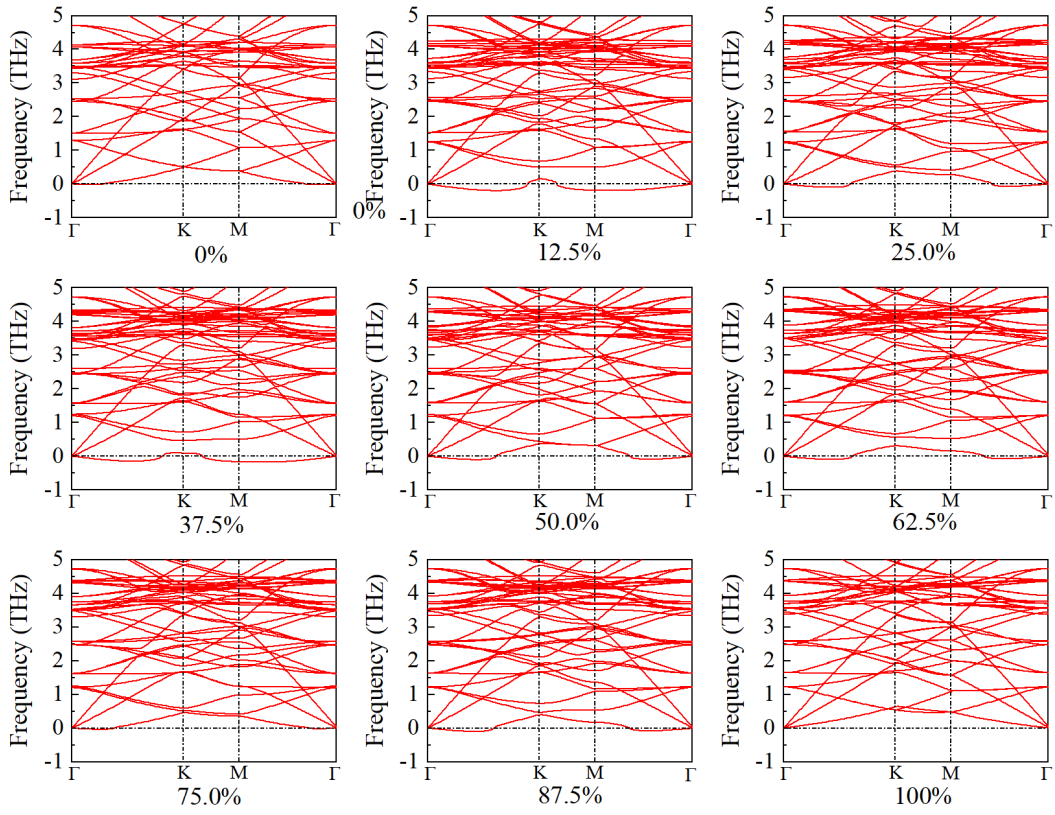

FIG. S5: The phonon spectra of hydrogenated SL *h*10-Si with the hydrogenation concentrations of 0%, 12.5%, 25.0%, 37.5%, 50.0%, 62.5%, 75.0%, 87.5% and 100%, respectively.

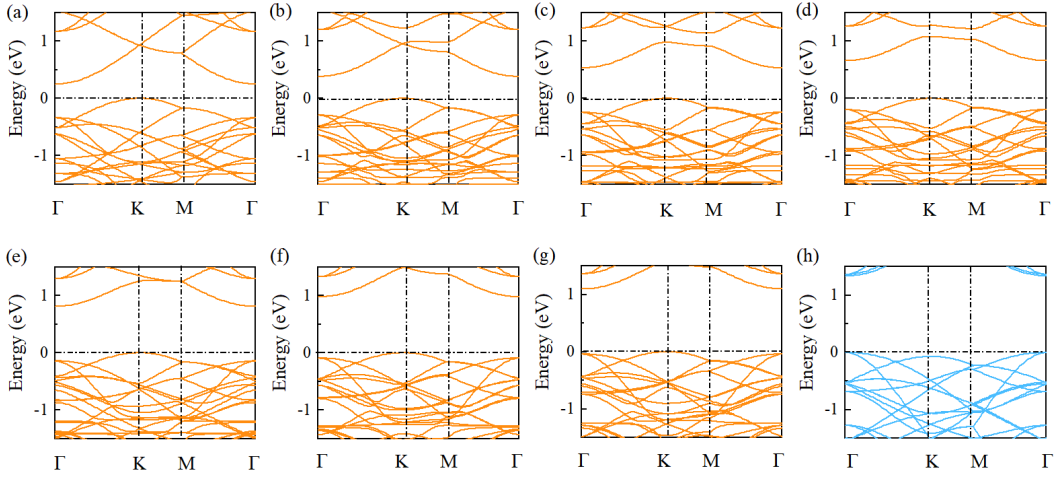

FIG. S6: The electronic band structures of (a) pristine and (b)-(h) hydrogenated SL *h*10-Si with the hydrogenation concentrations of 12.5%, 25.0%, 37.5%, 50.0%, 62.5%, 75.0%, and 100%, respectively.

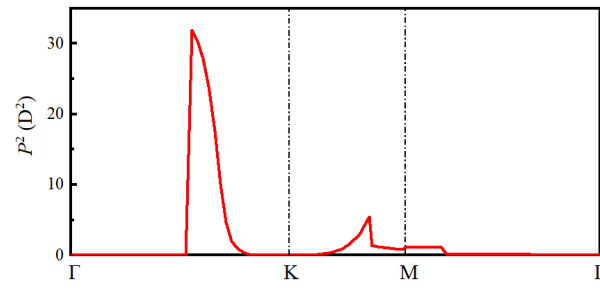

FIG. S7: The transition matrix elements between the top valence and the lowest conduction bands for fully hydrogenated SL  $h10$ -Si.
